# Supplementary material
Source: publisher figshare collection journal article supplement (https://sage.figshare.com/ndownloader/files/22412358)
Supplement: Supplementary file 1 [file 22412358]

## Supplemental Material

Data from the following papers were used in the meta-analyses. Superscripts indicate in which meta-analysis the data were used: 1 = Exploitation, 2 = Insecurity, 3 = Sociality, 4 = Obstruction, 5 = Duty, and 6 = Exploration.

<sup>1,4</sup>Ackermann, K. A., Fleiß, J., & Murphy, R. O. (2016). Reciprocity as an individual difference. *Journal of Conflict Resolution*, 60, 340–367. <https://doi.org/10.1177/0022002714541854>

<sup>3</sup>Aghababaei, N. (2014). God, the good life, and HEXACO: The relations among religion, subjective well-being and personality. *Mental Health, Religion and Culture*, 17, 284–290. <https://doi.org/10.1080/13674676.2013.797956>

<sup>3</sup>Aghababaei, N., & Arji, A. (2014). Well-being and the HEXACO model of personality. *Personality and Individual Differences*, 56, 139–142. <https://doi.org/10.1016/j.paid.2013.08.037>

<sup>1</sup>Aghababaei, N., & Blachnio, A. (2015). Well-being and the Dark Triad. *Personality and Individual Differences*, 86, 365–368. <https://doi.org/10.1016/j.paid.2015.06.043>

<sup>3</sup>Aghababaei, N., Blachnio, A., Arji, M., Chiniforoushan, M., & Mohammadtabar, S. (2015). The relations among well-being outcomes, religiosity, and personality. *Polish Psychological Bulletin*, 46, 460–468. <https://doi.org/10.1515/ppb-2015-0052>

<sup>3</sup>Aghababaei, N., Blachnio, A., Arji, A., Chiniforoushan, M., Tekke, M., & Mehrabadi, A. F. (2016). Honesty–Humility and the HEXACO structure of religiosity and well-being. *Current Psychology*, 35, 421–426. <https://doi.org/10.1007/s12144-015-9310-5>

<sup>1,3</sup>Aghababaei, N., Mohammadtabar, S., & Saffarinia, M. (2014). Dirty Dozen vs. the H factor: Comparison of the Dark Triad and Honesty–Humility in prosociality, religiosity, and happiness. *Personality and Individual Differences*, 67, 6–10. <https://doi.org/10.1016/j.paid.2014.03.026>

<sup>6</sup>Aghababaei, N., Wasserman, J. A., & Hatami, J. (2014). Personality factors and attitudes toward Euthanasia in Iran: Implications for end-of-life research and practice. *Death Studies*, 38, 91–99. <https://doi.org/10.1080/07481187.2012.731026>

<sup>1</sup>Agnello, C. L. (2012). *(Dis)Honesty, psychopathy, and their relation to empathic concern* (Master's thesis). Retrieved from

<sup>2,3</sup>Akbar, F., & Akhtar, S. (2017). Relationship of LMX and agreeableness with emotional exhaustion: A mediated moderated model. *Current Psychology*, 1–13. <https://doi.org/10.1007/s12144-017-9566-z>

<sup>1</sup>Altmann, S., Falk, A., & Grunewald, A. (2013). *Incentives and information as driving forces of default effects* (IZA Discussion Paper Series, No. 7610). Bonn: Institute for the Study of Labor (IZA). Retrieved from [https://papers.ssrn.com/sol3/papers.cfm?abstract\\_id=2329060](https://papers.ssrn.com/sol3/papers.cfm?abstract_id=2329060)

<sup>1</sup>Ashton, M. C., & Lee, K. (2008). The prediction of Honesty–Humility-related criteria by the HEXACO and Five-Factor Models of personality. *Journal of Research in Personality*, 42, 1216–1228. <https://doi.org/10.1016/j.jrp.2008.03.006>

<sup>2</sup>Ashton, M. C., Lee, K., Visser, B. A., & Pozzebon, J. A. (2008). Phobic tendency within the Five-Factor and HEXACO models of personality structure. *Journal of Research in Personality*, 42, 734–746. <https://doi.org/10.1016/j.jrp.2007.10.001>

- <sup>1</sup>Ashton, M. C., Paunonen, S. V., & Lee, K. (2014). On the validity of narrow and broad personality traits: A response to Salgado, Moscoso, and Berges (2013). *Personality and Individual Differences*, 56, 24–28. <https://doi.org/10.1016/j.paid.2013.08.019>
- <sup>3</sup>Aykac, M. (n.d.). *Accentuate the positive: Effects of dispositional optimism, personality traits and positive metacognitions & meta-emotions on life satisfaction*. Retrieved from [http://e-space.mmu.ac.uk/576745/1/Aykac%20\(Monika\)%202011%20\(Westminster\).pdf](http://e-space.mmu.ac.uk/576745/1/Aykac%20(Monika)%202011%20(Westminster).pdf)
- <sup>2,3</sup>Baer, S. M., Jenkins, J. S., & Barber, L. K. (2014). Home is private... do not enter! Introversion and sensitivity to work–home conflict. *Stress & Health*, 32, 441–445. <https://doi.org/10.1002/smi.2628>
- <sup>5</sup>Bailey, S. F., Barber, L. K., & Justice, L. M. (2016). Is self-leadership just self-regulation? Exploring construct validity with HEXACO and self-regulatory traits. *Current Psychology*, 37, 149–161. <https://doi.org/10.1007/s12144-016-9498-z>
- <sup>5</sup>Bakker, A. B., Sanz Vergel, A. I., & Kuntze, J. (2015). Student engagement and performance: A weekly diary study on the role of openness. *Motivation and Emotion*, 39, 49–62. <https://doi.org/10.1007/s11031-014-9422-5>
- <sup>3</sup>Bakker-Pieper, A., & de Vries, R. E. (2013). The incremental validity of communication styles over personality traits for leader outcomes. *Human Performance*, 26, 1–19. <https://doi.org/10.1080/08959285.2012.736900>
- <sup>1</sup>Balakrishnan, A., Plouffe, R. A., & Saklofske, D. H. (2017). What do sadists value? Is honesty-humility an intermediary? Replicating and extending findings on the link between values and “dark” personalities. *Personality and Individual Differences*, 109, 142–147. <https://doi.org/10.1016/j.paid.2016.12.055>
- <sup>6</sup>Barbarino, M.-L., & Stürmer, S. (2016). Different origins of xenophile and xenophobic orientations in human personality structure: A theoretical perspective and some preliminary findings. *Journal of Social Issues*, 72, 432–449. <https://doi.org/10.1111/josi.12175>
- <sup>1,4,5</sup>Barber, L. K., & Budnick, C. J. (2015). Turning molehills into mountains: Sleepiness increases workplace interpretive bias. *Journal of Organizational Behavior*, 36, 360–381. <https://doi.org/10.1002/job.1992>
- <sup>1</sup>Baughman, H. M. (2015). *Relationships between the Dark Triad and delayed gratification: An evolutionary perspective* (Master’s thesis). Retrieved from <https://ir.lib.uwo.ca/etd/3276>
- <sup>1,4</sup>Baumert, A., Schlösser, T., & Schmitt, M. (2014). Economic games: A performance-based assessment of fairness and altruism. *European Journal of Psychological Assessment*, 30, 178–192. <https://dx.doi.org/10.1027/1015-5759/a000183>
- <sup>1</sup>Bendahan, S., Zehnder, C., Pralong, F. P., & Antonakis, J. (2015). Leader corruption depends on power and testosterone. *The Leadership Quarterly*, 26, 101–122. <https://dx.doi.org/10.1016/j.leaqua.2014.07.010>
- <sup>6</sup>Benedek, M., Nordtvedt, N., Jauk, E., Koschmieder, C., Pretsch, J., Krammer, G., & Neubauer, A. C. (2016). Assessment of creativity evaluation skills: A psychometric investigation in prospective teachers. *Thinking Skills and Creativity*, 21, 75–84. <https://doi.org/10.1016/j.tsc.2016.05.007>

<sup>6</sup>Bergh, R., & Akrami, N. (2016). Are non-agreeable individuals prejudiced? Comparing different conceptualizations of agreeableness. *Personality and Individual Differences*, 101, 153–159. <https://doi.org/10.1016/j.paid.2016.05.052>

<sup>6</sup>Bergh, R., Akrami, N., Sidanius, J., & Sibley, C. G. (2016). Is group membership necessary for understanding generalized prejudice? A re-evaluation of why prejudices are interrelated. *Journal of Personality and Social Psychology*, 111, 367–395. <http://dx.doi.org/10.1037/pspi0000064>

<sup>1</sup>Blais, J., & Pruyers, S. (2017). The power of the dark side: Personality, the dark triad, and political ambition. *Personality and Individual Differences*, 113, 167–172. <https://doi.org/10.1016/j.paid.2017.03.029>

<sup>1</sup>Book, A., Visser, B. A., Blais, J., Hosker-Field, A., Methot-Jones, T., Gauthier, N. Y., . . . D'Agata, M. T. (2016). Unpacking more “evil”: What is at the core of the dark tetrad? *Personality and Individual Differences*, 90, 269–272. <https://doi.org/10.1016/j.paid.2015.11.009>

<sup>1</sup>Book, A. S., Volk, A. A., & Hosker, A. (2012). Adolescent bullying and personality: An adaptive approach. *Personality and Individual Differences*, 52, 218–223. <https://doi.org/10.1016/j.paid.2011.10.028>

<sup>1,5</sup>Bourdage, J. S., Goupal, A., Neilson, T., Lukacik, E.-R., & Lee, N. (2018). Personality, equity sensitivity, and discretionary workplace behavior. *Personality and Individual Differences*, 120, 144–150. <https://doi.org/10.1016/j.paid.2017.08.018>

<sup>1</sup>Bourdage, J. S., Lee, K., Ashton, M. C., & Perry, A. (2007). Big Five and HEXACO model personality correlates of sexuality. *Personality and Individual Differences*, 43, 1506–1516. <https://doi.org/10.1016/j.paid.2007.04.008>

<sup>5</sup>Bourdage, J. S., Lee, K., Lee, J.-H., & Shin, K.-H. (2012). Motives for organizational citizenship behavior: Personality correlates and coworker ratings of OCB. *Human Performance*, 25, 179–200. <https://doi.org/10.1080/08959285.2012.683904>

<sup>1,3</sup>Boyd, S. (2013). *Further development of a model of environmental commitment* (Master's thesis). Retrieved from <https://ir.library.illinoisstate.edu/etd/134>

<sup>1,5</sup>Boyes, F. A. J. (2005). *Personality as a predictor of military performance and counterproductive behavior* (Master's thesis). Retrieved from <http://library2.smu.ca/handle/01/22475#.W1jB9dlzZdg>

<sup>1</sup>Breevaart, K., & de Vries, R. E. (2017). Supervisor's HEXACO personality traits and subordinate perceptions of abusive supervision. *The Leadership Quarterly*, 28, 691–700. <https://doi.org/10.1016/j.leaqua.2017.02.001>

<sup>1</sup>Bresin, K., & Gordon, K. H. (2011). Characterizing pathological narcissism in terms of the HEXACO model of personality. *Journal of Psychopathology and Behavioral Assessment*, 33, 228–235. <https://doi.org/10.1007/s10862-010-9210-9>

<sup>1,6</sup>Brick, C., & Lewis, G. J. (2016). Unearthing the “green” personality: Core traits predict environmentally friendly behavior. *Environment and Behavior*, 48, 635–658. <https://doi.org/10.1177/0013916514554695>

<sup>3,5</sup>Brink, E. R. (2014). *The relationships between the HEXACO personality dimensions and organisational citizenship behaviours within the civil engineering sector* (Master's thesis). Retrieved from <https://scholar.sun.ac.za/handle/10019.1/96098>

- <sup>1</sup>Brown, S. C., & MacDonald, R. A. R. (2014). Predictive factors of music piracy: An exploration of personality using the HEXACO PI-R. *Musicae Scientiae*, 18, 53–64. <https://doi.org/10.1177/1029864913510016>
- <sup>3</sup>Bucă, A., Călin, M., & Mincu, L. (2016). The relationship between HEXACO model of personality and employee well-being. *Romanian Journal of Experimental Applied Psychology*, 7(1), 26–37. <http://dx.doi.org/10.15303/rjeap.2016.v7i1.a4>
- <sup>1,5</sup>Buehl, A.-K., & Melchers, K. G. (2017). Individual difference variables and the occurrence and effectiveness of faking behavior in interviews. *Frontiers in Psychology*, 8, Article 686. <https://doi.org/10.3389/fpsyg.2017.00686>
- <sup>1</sup>Burns, C. E. (2013). *The relationship between personality and computer deviance* (Doctoral dissertation). Retrieved from <https://eric.ed.gov/?id=ED562924>
- <sup>1,3</sup>Burtăverde, V. (2015). Psychometric properties of the HEXACO PI-R on a Romanian sample. The relationship with work outcomes and general outcomes. *Romanian Journal of Experimental Applied Psychology*, 6(1), 31–58.
- <sup>1,2,3</sup>Ceschi, A., Sartori, R., Dickert, S., & Costantini, A. (2016). Grit or Honesty-Humility? New insights into the moderating role of personality between the health impairment process and counterproductive work behavior. *Frontiers in Psychology*, 7, Article 1799. <https://doi.org/10.3389/fpsyg.2016.01799>
- <sup>6</sup>Chen, B.-B. (2016). Conscientiousness and everyday creativity among Chinese undergraduate students. *Personality and Individual Differences*, 102, 56–59. <https://doi.org/10.1016/j.paid.2016.06.061>
- <sup>6</sup>Chen, B.-B. (2016). The creative self-concept as a mediator between openness to experience and creative behaviour. *Creativity. Theories–Research–Applications*, 3, 408–417. <https://doi.org/10.1515/ctra-2016-0024>
- <sup>3</sup>Chen, S. (2015). *A latent profile analysis of romantic relationship quality and its associations with personality, partner support, and psychological well-being* (Master's thesis). Retrieved from <http://ir.lib.uwo.ca/etd/2977>
- <sup>1,3</sup>Chen, Z., Watson, P. J., Biderman, M., & Ghorbani, N. (2015). Investigating the properties of the General Factor (M) in bifactor models applied to Big Five or HEXACO data in terms of method or meaning. *Imagination, Cognition, and Personality*, 35, 216–243. <https://doi.org/10.1177/0276236615590587>
- <sup>2,3</sup>Chiesi, F., Donati, M. A., Panno, A., Giacomantonio, M., & Primi, C. (2017). What about the different shortened versions of the Mindful Attention Awareness Scale? *Psychological Reports*, 120, 966–990. <https://doi.org/10.1177/0033294117711132>
- <sup>6</sup>Chirumbolo, A., & Leone, L. (2010). Personality and politics: The role of the HEXACO model of personality in predicting ideology and voting. *Personality and Individual Differences*, 49, 43–48. <https://doi.org/10.1016/j.paid.2010.03.004>
- <sup>1</sup>Choi, J. (2014). *Development and validation of the Workplace Social Dominance Orientation Scale* (Master's thesis). Retrieved from <https://prism.ucalgary.ca/handle/11023/1896>

- <sup>1</sup>Cianci, A. M., Hannah, S. T., Roberts, R. P., & Tsakumis, G. T. (2014). The effects of authentic leadership on followers' ethical decision-making in the face of temptation: An experimental study. *The Leadership Quarterly*, 25, 581–594. <https://doi.org/10.1016/j.leaqua.2013.12.001>
- <sup>6</sup>Class, K. J. (2017). *Who is more creative? Assessing the role that individual characteristics play in their relationship with creativity in various domains* (Master's thesis). Retrieved from <http://search.proquest.com/openview/66336dd6ce25cca8b6f648740cb6d613/1?pq-origsite=gscholar&cbl=18750&diss=y>
- <sup>1,5</sup>Cohen, T. R., Panter, A. T., Turan, N., Morse, L., & Kim, Y. (2013). Agreement and similarity in self-other perceptions of moral character. *Journal of Research in Personality*, 47, 816–830. <https://doi.org/10.1016/j.jrp.2013.08.009>
- <sup>1,5</sup>Cohen, T. R., Panter, A. T., Turan, N., Morse, L., & Kim, Y. (2014). Moral character in the workplace. *Journal of Personality and Social Psychology*, 107, 943–963. <https://doi.org/10.1037/a0037245>
- <sup>2,3,5</sup>Costantini, G., & Perugini, M. (2016). The network of conscientiousness. *Journal of Research in Personality*, 65, 68–88. <https://doi.org/10.1016/j.jrp.2016.10.003>
- <sup>1</sup>Czibor, A., Szabo, Z. P., Jones, D. N., Zsido, A. N., Paal, T., Szijarto, L., . . . Bereczkei, T. (2017). Male and female face of Machiavellianism: Opportunism or anxiety? *Personality and Individual Differences*, 117, 221–229. <https://doi.org/10.1016/j.paid.2017.06.002>
- <sup>1,4</sup>Davis, D. E., Hook, J. N., Worthington, E. L., Jr., van Tongeren, D. R., Gartner, A. L., Jennings, D. J., II, & Emmons, R. A. (2011). Relational humility: Conceptualizing and measuring humility as a personality judgment. *Journal of Personality Assessment*, 93, 225–234. <https://doi.org/10.1080/00223891.2011.558871>
- <sup>3,5</sup>Davis, J. L. (2015). *The moderating influence of personality on combat veterans transitioning into civilian college life* (Master's thesis). Retrieved from <http://scholar.utc.edu/theses/179>
- <sup>1,5</sup>De Vries, A., de Vries, R. E., & Born, M. P. (2011). Broad versus narrow traits: Conscientiousness and honesty-humility as predictors of academic criteria. *European Journal of Personality*, 25, 336–348. <https://doi.org/10.1002/per.795>
- <sup>3</sup>De Vries, R. E. (2012). Personality predictors of leadership styles and the self-other agreement problem. *The Leadership Quarterly*, 23, 809–821. <https://doi.org/10.1016/j.leaqua.2012.03.002>
- <sup>2</sup>De Vries, R. E. (2013). The 24-item Brief HEXACO Inventory (BHI). *Journal of Research in Personality*, 47, 871–880. <https://doi.org/10.1016/j.jrp.2013.09.003>
- <sup>1</sup>De Vries, R. E., de Vries, A., de Hoogh, A., & Feij, J. (2009). More than the Big Five: Egoism and the HEXACO model of personality. *European Journal of Personality*, 23, 635–654. <https://doi.org/10.1002/per.733>
- <sup>2</sup>De Vries, R. E., de Vries, A., & Feij, J. A. (2009). Sensation seeking, risk-taking, and the HEXACO model of personality. *Personality and Individual Differences*, 47, 536–540. <https://doi.org/10.1016/j.paid.2009.05.029>
- <sup>1</sup>De Vries, R. E., Lee, K., & Ashton, M. C. (2008). The Dutch HEXACO Personality Inventory: Psychometric properties, self-other agreement, and relations with psychopathy among low and high acquaintanceship dyads. *Journal of Personality Assessment*, 90, 142–151. <https://doi.org/10.1080/00223890701845195>

- <sup>1,2</sup>De Vries, R. E., Pathak, R. D., van Gelder, J.-L., & Singh, G. (2017). Explaining unethical business decisions: The role of personality, environment, and states. *Personality and Individual Differences*, 117, 188–197. <https://doi.org/10.1016/j.paid.2017.06.007>
- <sup>1,5</sup>De Vries, R. E., & van Gelder, J.-L. (2013). Tales of two self-control scales: Relations with Five-Factor and HEXACO traits. *Personality and Individual Differences*, 54, 756–760. <https://doi.org/10.1016/j.paid.2012.12.023>
- <sup>1,2</sup>De Vries, R. E., & van Gelder, J.-L. (2015). Explaining workplace delinquency: The role of Honesty-Humility, ethical culture, and employee surveillance. *Personality and Individual Differences*, 86, 112–116. <https://doi.org/10.1016/j.paid.2015.06.008>
- <sup>1</sup>De Vries, R. E., & van Kampen, D. (2010). The HEXACO and 5DPT models of personality: A comparison and their relationships with psychopathy, egoism, pretentiousness, immorality, and Machiavellianism. *Journal of Personality Disorders*, 24, 244–257. <https://doi.org/10.1521/pedi.2010.24.2.244>
- <sup>1</sup>De Vries, R. E., Wawoe, K. W., & Holtrop, D. (2016). What is engagement? Proactivity as the missing link in the HEXACO Model of Personality. *Journal of Personality*, 84, 178–193. <https://doi.org/10.1111/jopy.12150>
- <sup>5</sup>De Vries, R. E., Zettler, I., & Hilbig, B. E. (2014). Rethinking trait conceptions of social desirability scales: Impression management as an expression of Honesty-Humility. *Assessment*, 21, 286–299. <https://doi.org/10.1177/1073191113504619>
- <sup>1,5</sup>Della Valle, N. (2017). *Social context and decisions: Essays in experimental economics* (Doctoral dissertation). Retrieved from <http://eprints-phd.biblio.unitn.it/2024/>
- <sup>6</sup>Desimoni, M., & Leone, L. (2014). Openness to Experience, Honesty-Humility and ideological attitudes: A fine-grained analysis. *Personality and Individual Differences*, 59, 116–119. <https://doi.org/10.1016/j.paid.2013.10.031>
- <sup>1</sup>DiFonzo, A. (2016). *Cyberbullying, social media & fitness selfies: An evolutionary perspective* (Master's thesis). Retrieved from <https://dr.library.brocku.ca/handle/10464/10433>
- <sup>1</sup>Djeriouat, H., & Trémolière, B. (2014). The Dark Triad of personality and utilitarian moral judgment: The mediating role of Honesty/Humility and Harm/Care. *Personality and Individual Differences*, 67, 11–16. <https://doi.org/10.1016/j.paid.2013.12.026>
- <sup>1</sup>Dubois, P. (2015). *Exploiting psycholinguistic predictors to develop the Vocabulary Overclaiming in English (VOCE) measure* (Master's thesis). Retrieved from <https://open.library.ubc.ca/collections/ubctheses/24/items/1.0166647>
- <sup>1</sup>Dunlop, P. D., Bourdage, J. S., de Vries, R. E., Hilbig, B. E., Zettler, I., & Ludeke, S. G. (2017). Openness to (reporting) experiences that one never had: Overclaiming as an outcome of the knowledge accumulated through a proclivity for cognitive and aesthetic exploration. *Journal of Personality and Social Psychology*, 113, 810–834. <http://dx.doi.org/10.1037/pspp0000110>
- <sup>1</sup>Dunlop, P. D., Morrison, D. L., Koenig, J., & Silcox, B. (2012). Comparing the Eysenck and HEXACO models of personality in the prediction of adult delinquency. *European Journal of Personality*, 26, 194–202. <https://doi.org/10.1002/per.824>

- <sup>1,6</sup>Durfeld, C., Martin, R., Washburn, A., & Wilson, A. (2016). An analysis of prosocial behavior in college students. *Metamorphosis* Retrieved from <https://metamorphosis.coplac.org/index.php/metamorphosis/article/view/21>
- <sup>5</sup>Durso-Finley, J. (2016). *Predicting High School GPA using HEXACO personality domains and the Secondary School Admission Test* (Doctoral dissertation). Retrieved from <http://digitalcommons.liberty.edu/doctoral/1237>
- <sup>1</sup>Du Toit, D. (2015). *The development of an ethical integrity test* (Master's thesis). Retrieved from <https://scholar.sun.ac.za/handle/10019.1/98098>
- <sup>1</sup>Effelsberg, D., Solga, M., & Gurt, J. (2014). Getting followers to transcend their self-interest for the benefit of their company: Testing a core assumption of Transformational Leadership Theory. *Journal of Business and Psychology*, 29, 131–143. <https://doi.org/10.1007/s10869-013-9305-x>
- <sup>2,3</sup>Ellis, D. A., & Merdian, H. L. (2015). Thinking outside the box: Developing dynamic data visualizations for psychology with Shiny. *Frontiers in Psychology*, 6, Article 1782. <https://doi.org/10.3389/fpsyg.2015.01782>
- <sup>5</sup>Englert, C., & Rummel, J. (2016). I want to keep on exercising but I don't: The negative impact of momentary lacks of self-control on exercise adherence. *Psychology of Sport and Exercise*, 26, 24–31. <https://doi.org/10.1016/j.psychsport.2016.06.001>
- <sup>1</sup>Ewing, D., Zeigler-Hill, V., & Vonk, J. (2016). Spitefulness and deficits in the social–perceptual and social–cognitive components of Theory of Mind. *Personality and Individual Differences*, 91, 7–13. <https://doi.org/10.1016/j.paid.2015.11.050>
- <sup>3,4</sup>Falk, A., & Fox, S. (2014). Victims' and observers' reactions to organizational unfairness: The role of moral-altruist personality. *Basic and Applied Social Psychology*, 36, 425–442. <https://doi.org/10.1080/01973533.2014.936062>
- <sup>3</sup>Farrell, A. (2014). *Predicting physical, verbal, social, racial, and sexual bullying with individual and environmental factors from an evolutionary ecological framework* (Master's thesis). Retrieved from <http://dr.library.brocku.ca/handle/10464/5602>
- <sup>3</sup>Farrell, A. H., Brook, C., Dane, A. V., Marini, Z. A., & Volk, A. A. (2015). Relations between adolescent ratings of Rothbart's temperament questionnaire and the HEXACO Personality Inventory. *Journal of Personality Assessment*, 97, 163–171. <https://doi.org/10.1080/00223891.2014.940961>
- <sup>1</sup>Farrell, A. H., Della Cioppa, V., Volk, A. A., & Book, A. S. (2014). Predicting bullying heterogeneity with the HEXACO model of personality. *International Journal of Advances in Psychology*, 3(2), 30–39. <https://doi.org/10.14355/ijap.2014.0302.02>
- <sup>1</sup>Farrell, A. H., Provenzano, D. A., Dane, A. V., Marini, Z. A., & Volk, A. A. (2017). Maternal knowledge, adolescent personality, and bullying. *Personality and Individual Differences*, 104, 413–416. <https://doi.org/10.1016/j.paid.2016.09.001>
- <sup>1,2,4</sup>Fiedler, S., Glöckner, A., Dickert, S., & Nicklisch, A. (2013). Social Value Orientation and information search in social dilemmas: An eye-tracking analysis. *Organizational Behavior and Human Decision Processes*, 120, 272–284. <https://doi.org/10.1016/j.obhdp.2012.07.002>
- <sup>1</sup>Fossati, A., Pincus, A. L., Borroni, S., Munteanu, A. F., & Maffei, C. (2014). Are pathological narcissism and psychopathy different constructs or different names for the same thing? A study

based on Italian nonclinical adult participants. *Journal of Personality Disorders*, 28, 394–418. [https://doi.org/10.1521/pedi\\_2014\\_28\\_127](https://doi.org/10.1521/pedi_2014_28_127)

<sup>1</sup>Francis, K. B., Howard, C., Howard, I. S., Gummerum, M., Ganis, G., Anderson, G., & Terbeck, S. (2016). Virtual morality: Transitioning from moral judgment to moral action? *PLOS ONE*, 11(10), e0164374. <https://doi.org/10.1371/journal.pone.0164374>

<sup>1</sup>Francis, R. E. (2012). *Development of a personality-based measure of integrity* (Master's thesis). Retrieved from <http://library2.smu.ca/xmlui/handle/01/25015#.W1jSY9IzZdg>

<sup>1</sup>Galić, Z. (2016). Conditional Reasoning Test for Aggression: Further evidence about incremental validity. *International Journal of Selection and Assessment*, 24, 24–33. <https://doi.org/10.1111/ijsa.12126>

<sup>2</sup>Gargalianou, V., Muehlfeld, K., Urbig, D., & van Witteloostuijn, A. (2016). Foreign language anxiety in professional contexts. *Schmalenbach Business Review*, 17(2), 1–29. <https://doi.org/10.1007/s41464-016-0007-6>

<sup>1</sup>Gaughan, E. T. (2009). *Examining the predictive and incremental validity of two general models of personality: A study of psychopathy using the HEXACO-PI-R and NEO PI-R* (Master's thesis). Retrieved from [https://getd.libs.uga.edu/pdfs/gaughan\\_eric\\_t\\_200905\\_ms.pdf](https://getd.libs.uga.edu/pdfs/gaughan_eric_t_200905_ms.pdf)

<sup>1</sup>Gaughan, E. T., Miller, J. D., & Lynam, D. R. (2012). Examining the utility of general models of personality in the study of psychopathy: A comparison of the HEXACO-PI-R and NEO PI-R. *Journal of Personality Disorders*, 26, 513–523. <https://doi.org/10.1521/pedi.2012.26.4.513>

<sup>1</sup>Gentile, B. (2013). *Investigating alternative response sets with the Narcissistic Personality Inventory: Validation of a new Likert version* (Doctoral dissertation). Retrieved from [https://getd.libs.uga.edu/pdfs/gentile\\_brittany\\_201308\\_phd.pdf](https://getd.libs.uga.edu/pdfs/gentile_brittany_201308_phd.pdf)

<sup>1</sup>Gerpott, F. H., Balliet, D., Columbus, S., Molho, C., & de Vries, R. E. (2017). How do people think about interdependence? A multidimensional model of subjective outcome interdependence. *Journal of Personality and Social Psychology*. <https://doi.org/10.1037/pspp0000166>

<sup>1</sup>Geven, L., Ben-Shakhar, G., Kindt, M., & Verschuere, B. (2017). Memory-based deception detection: Extending the cognitive signature of lying from instructed to self-initiated cheating. *Topics in Cognitive Science*. <https://doi.org/10.1111/tops.12353>

<sup>1</sup>Giammarco, E. A. (2014). *The development and validation of a multidimensional measure of moral orientation* (Master's thesis). Retrieved from <https://ir.lib.uwo.ca/etd/2255>

<sup>1</sup>Gibson, R., Sohn, M., Tanner, C., & Wagner, A. F. (2018). *Investing in managerial honesty* (Swiss Finance Institute, Research Paper No. 17-03, and European Corporate Governance Institute, Finance Working Paper No. 516/2017). Retrieved from [http://ssrn.com/abstract\\_id=2912795](http://ssrn.com/abstract_id=2912795)

<sup>1,2</sup>Gillath, O., Sesko, A. K., Shaver, P. R., & Chun, D. S. (2010). Attachment, authenticity, and honesty: Dispositional and experimentally induced security can reduce self- and other-deception. *Journal of Personality and Social Psychology*, 98, 841–855. <https://doi.org/10.1037/a0019206>

<sup>1</sup>Gok, K., Sumanth, J. J., Bommer, W. H., Demirtas, O., Arslan, A., Eberhard, J., . . . Yigit, A. (2017). You may not reap what you sow: How employees' moral awareness minimizes ethical leadership's positive impact on workplace deviance. *Journal of Business Ethics*, 146, 257–277. <https://doi.org/10.1007/s10551-017-3655-7>



- <sup>2,3</sup>Golub, S. A., & Gamarel, K. E. (2017). Psychometric evaluation of the Condom Barriers and Motivations Scale (CBMS). *Journal of Behavioral Medicine*, 40, 494–505. <https://doi.org/10.1007/s10865-016-9815-x>
- <sup>1</sup>Górník-Durose, M. E., & Pilch, I. (2016). The dual nature of materialism. How personality shapes materialistic value orientation. *Journal of Economic Psychology*, 57, 102–116. <https://doi.org/10.1016/j.joep.2016.09.008>
- <sup>1</sup>Grieve, R. (2012). The role of personality, psychopathy, and previous experience with assessment in intentions to fake in psychological testing. *Current Psychology*, 31, 414–422. <https://doi.org/10.1007/s12144-012-9158-x>
- <sup>2</sup>Grieve, R., Kemp, N., Norris, K., & Padgett, C. R. (2017). Push or pull? Unpacking the social compensation hypothesis of Internet use in an educational context. *Computers & Education*, 109, 1–10. <https://doi.org/10.1016/j.compedu.2017.02.008>
- <sup>3,4</sup>Guo, J. (2012). *The formation and change of overall justice perceptions: Consideration of time, events, and affect* (Doctoral dissertation). Retrieved from <https://www.ideals.illinois.edu/handle/2142/31055>
- <sup>1,2</sup>Halevy, N., Cohen, T. R., Chou, E. Y., Katz, J. J., & Panter, A. T. (2014). Mental models at work: Cognitive causes and consequences of conflict in organizations. *Personality and Social Psychology Bulletin*, 40, 92–110. <https://doi.org/10.1177/0146167213506468>
- <sup>5</sup>Häusler, A. N., Becker, B., Bartling, M., & Weber, B. (2015). Goal or gold: Overlapping reward processes in soccer players upon scoring and winning money. *PLOS ONE*, 10(4), e0122798. <https://doi.org/10.1371/journal.pone.0122798>
- <sup>1</sup>Havârneanu, C.-E., & Măirean, C. (2016). Personality traits as predictors of aggressive violations on the road: Driving experience as a moderator. *Romanian Journal of Experimental Applied Psychology*, 7(SI1), 71–75.
- <sup>1,3</sup>Hébert, A., & Weaver, A. (2014). An examination of personality characteristics associated with BDSM orientations. *Canadian Journal of Human Sexuality*, 23, 106–115. <http://dx.doi.org/10.3138/cjhs.2467>
- <sup>1,3,6</sup>Hergert, J. (2016). The (B)ODD-Model of Sexual Infidelity: A model test with longitudinal data. In J. Hergert (Ed.), *Personality, situation, and infidelity in romantic relationships* (Doctoral dissertation, pp. 163–193). Retrieved from <https://d-nb.info/111489026X/34>
- <sup>1,5</sup>Hershfield, H. E., Cohen, T. R., & Thompson, L. (2012). Short horizons and tempting situations: Lack of continuity to our future selves leads to unethical decision making and behavior. *Organizational Behavior and Human Decision Processes*, 117, 298–310. <https://doi.org/10.1016/j.obhdp.2011.11.002>
- <sup>1</sup>Hilbig, B. E., Glöckner, A., & Zettler, I. (2014). Personality and prosocial behavior: Linking basic traits and social value orientations. *Journal of Personality and Social Psychology*, 107, 529–539. <https://doi.org/10.1037/a0036074>
- <sup>1</sup>Hilbig, B. E., Moshagen, M., & Zettler, I. (2015). Truth will out: Linking personality, morality, and honesty through indirect questioning. *Social Psychological and Personality Science*, 6, 140–147. <https://doi.org/10.1177/1948550614553640>

- <sup>1</sup>Hilbig, B. E., Moshagen, M., & Zettler, I. (2016). Prediction Consistency: A test of the equivalence assumption across different indicators of the same construct. *European Journal of Personality*, 30, 637–647. <https://doi.org/10.1002/per.2085>
- <sup>1</sup>Hilbig, B. E., Thielmann, I., Hepp, J., Klein, S. A., & Zettler, I. (2015). From personality to altruistic behavior (and back): Evidence from a double-blind dictator game. *Journal of Research in Personality*, 55, 46–50. <https://doi.org/10.1016/j.jrp.2014.12.004>
- <sup>1,4</sup>Hilbig, B. E., Thielmann, I., Klein, S. A., & Henninger, F. (2016). The two faces of cooperation: On the unique role of HEXACO Agreeableness for forgiveness versus retaliation. *Journal of Research in Personality*, 64, 69–78. <https://doi.org/10.1016/j.jrp.2016.08.004>
- <sup>1</sup>Hilbig, B. E., Thielmann, I., Wühlrl, J., & Zettler, I. (2015). From Honesty-Humility to fair behavior: Benevolence or a (blind) fairness norm? *Personality and Individual Differences*, 80, 91–95. <https://doi.org/10.1016/j.paid.2015.02.017>
- <sup>1</sup>Hilbig, B. E., & Zettler, I. (2009). Pillars of cooperation: Honesty-Humility, social value orientations, and economic behavior. *Journal of Research in Personality*, 43, 516–519. <https://doi.org/10.1016/j.jrp.2009.01.003>
- <sup>1</sup>Hilbig, B. E., & Zettler, I. (2015). When the cat's away, some mice will play: A basic trait account of dishonest behavior. *Journal of Research in Personality*, 57, 72–88. <https://doi.org/10.1016/j.jrp.2015.04.003>
- <sup>1</sup>Hilbig, B. E., Zettler, I., & Heydasch, T. (2012). Personality, punishment and public goods: Strategic shifts towards cooperation as a matter of dispositional Honesty-Humility. *European Journal of Personality*, 26, 245–254. <https://doi.org/10.1002/per.830>
- <sup>1,4</sup>Hilbig, B. E., Zettler, I., Leist, F., & Heydasch, T. (2013). It takes two: Honesty-Humility and Agreeableness differentially predict active versus reactive cooperation. *Personality and Individual Differences*, 54, 598–603. <https://doi.org/10.1016/j.paid.2012.11.008>
- <sup>1</sup>Hilbig, B. E., Zettler, I., Moshagen, M., & Heydasch, T. (2013). Tracing the path from personality—Via cooperativeness—To conservation. *European Journal of Personality*, 27, 319–327. <https://doi.org/10.1002/per.1856>
- <sup>1,6</sup>Ho, A. K., Sidanius, J., Kteily, N., Sheehy-Skeffington, J., Pratto, F., Henkel, K. E., . . . Stewart, A. L. (2015). The nature of social dominance orientation: Theorizing and measuring preferences for intergroup inequality using the new SDO<sub>7</sub> scale. *Journal of Personality and Social Psychology*, 109, 1003–1028. <https://doi.org/10.1037/pspi0000033>
- <sup>1,5</sup>Holtrop, D., Born, M. P., de Vries, A., & de Vries, R. E. (2014). A matter of context: A comparison of two types of contextualized personality measures. *Personality and Individual Differences*, 68, 234–240. <https://doi.org/10.1016/j.paid.2014.04.029>
- <sup>3,5</sup>Holtrop, D., Born, M. P., & de Vries, R. E. (2014). Predicting performance with contextualized inventories, no frame-of-reference effect? *International Journal of Selection and Assessment*, 22, 219–223. <https://doi.org/10.1111/ijsa.12071>
- <sup>6</sup>Hunter, J. A. (2015). *The inspiration of boredom: An investigation of the relationship between boredom and creativity* (Master's thesis). Retrieved from <http://yorkspace.library.yorku.ca/xmlui/handle/10315/30697>

- <sup>6</sup>Hunter, J. A., Abraham, E. H., Hunter, A. G., Goldberg, L. C., & Eastwood, J. D. (2016). Personality and boredom proneness in the prediction of creativity and curiosity. *Thinking Skills and Creativity*, 22, 48–57. <https://doi.org/10.1016/j.tsc.2016.08.002>
- <sup>1,5</sup>Husbands, A., Rodgers, M. J., Dowell, J., & Patterson, F. (2015). Evaluating the validity of an integrity-based situational judgement test for medical school admissions. *BMC Medical Education*, 15, Article 144. <https://doi.org/10.1186/s12909-015-0424-0>
- <sup>3</sup>Jayawickreme, E., Brocato, N. W., & Blackie, L. E. R. (2017). Wisdom gained? Assessing relationships between adversity, personality and well-being among a late adolescent sample. *Journal of Youth and Adolescence*, 46, 1179–1199. <https://doi.org/10.1007/s10964-017-0648-x>
- <sup>6</sup>Jonason, P. K. (2014). Personality and politics. *Personality and Individual Differences*, 71, 181–184. <https://doi.org/10.1016/j.paid.2014.08.002>
- <sup>1</sup>Jonason, P. K., Foster, J. D., McCain, J., & Campbell, W. K. (2015). Where birds flock to get together: The who, what, where, and why of mate searching. *Personality and Individual Differences*, 80, 76–84. <https://doi.org/10.1016/j.paid.2015.02.018>
- <sup>1</sup>Jonason, P. K., & McCain, J. (2012). Using the HEXACO model to test the validity of the Dirty Dozen measure of the Dark Triad. *Personality and Individual Differences*, 53, 935–938. <https://doi.org/10.1016/j.paid.2012.07.010>
- <sup>1,4,5</sup>Jones, K. S. (2011). “I’m too good to be bad”: The moderating role of Honesty-Humility in aggressive and prosocial reactions to first and third party unfairness (Master’s thesis). Retrieved from <https://www.ideals.illinois.edu/handle/2142/24195>
- <sup>1,5</sup>Jones, S. (2017). Does choice of measure matter? Assessing the similarities and differences among self-control scales. *Journal of Criminal Justice*, 50, 78–85. <https://doi.org/10.1016/j.jcrimjus.2017.04.005>
- <sup>4</sup>Julian, A. (2015). *HEXACO personality traits and perceptions of organizational politics as predictors of workplace revenge* (Master’s thesis). Retrieved from <http://theses.ualgarny.ca/handle/11023/2600>
- <sup>6</sup>Jylhä, K. M. (2016). *Ideological roots of climate change denial: Resistance to change, acceptance of inequality, or both?* (Doctoral dissertation). Retrieved from <http://www.diva-portal.org/smash/record.jsf?pid=diva2%3A945529&dsid=8671>
- <sup>5</sup>Kajonius, P. J. (2016). Honesty-Humility predicting self-estimated academic performance. *International Journal of Personality Psychology*, 2(1), 1–6.
- <sup>1,4</sup>Kaltwasser, L., Hildebrandt, A., Wilhelm, O., & Sommer, W. (2016). Behavioral and neuronal determinants of negative reciprocity in the ultimatum game. *Social Cognitive and Affective Neuroscience*, 11, 1608–1617. <https://doi.org/10.1093/scan/nsw069>
- <sup>1</sup>Kawamoto, T. (2015). Development of Japanese version of the Long-Term Mating Orientation Scale (LTMO-J). *Japanese Psychological Research*, 57, 323–336. <https://doi.org/10.1111/jpr.12092>
- <sup>1</sup>Kieslich, P. J., & Hilbig, B. E. (2014). Cognitive conflict in social dilemmas: An analysis of response dynamics. *Judgment and Decision Making*, 9, 510–522.

<sup>2</sup>Kim, Y., Kim, K., & Kim, T. H. (2014). Domain specific relationships of 2D:4D digit ratio in risk perception and risk behavior. *The Journal of General Psychology, 141*, 373–392. <https://doi.org/10.1080/00221309.2014.950188>

<sup>6</sup>Kinga, S., Kármén, D., Enikő, B., Andrea, B., & Noémi-Emese, K. (2014). Creativity and personality profiles of adolescents based on cyberbullying roles—Pilot study. *Transylvanian Journal of Psychology, 2*, 181–198.

<sup>6</sup>Kinga, S., Paul, M., & Sefan, S. (2015). Associations between HEXACO model of personality structure, motivational factors and self-reported creativity among architecture students. *Procedia: Social and Behavioral Sciences, 187*, 130–135. <https://doi.org/10.1016/j.sbspro.2015.03.025>

<sup>1</sup>Knight, N. M. (2016). *The Dark Triad and HEXACO model of personality in relational aggression* (Master's thesis). Retrieved from [https://aquila.usm.edu/masters\\_theses/164](https://aquila.usm.edu/masters_theses/164)

<sup>1</sup>Komar, J. A. (2013). *The faking dilemma: Examining competing motivations in the decision to fake personality tests for personnel selection* (Doctoral dissertation). Retrieved from <https://uwspace.uwaterloo.ca/handle/10012/7697>

<sup>1</sup>Kruse, E., Chancellor, J., & Lyubomirsky, S. (2017). State humility: Measurement, conceptual validation, and intrapersonal processes. *Self and Identity, 16*, 399–438. <https://doi.org/10.1080/15298868.2016.1267662>

<sup>2</sup>Küpper, A. (2016). *Personality as determinant of domain specific risk attitude and behavior* (Bachelor's thesis). Retrieved from [https://essay.utwente.nl/69824/1/K%C3%BCpper\\_BA\\_PCRS.pdf](https://essay.utwente.nl/69824/1/K%C3%BCpper_BA_PCRS.pdf)

<sup>2,4,5</sup>Law, S. (2014). *Examining the effect of warning instructions in the interview* (Master's thesis). Retrieved from <http://theses.ucalgary.ca/handle/11023/1915>

<sup>2</sup>Law, S. J., Bourdage, J., & O'Neill, T. A. (2016). To fake or not to fake: Antecedents to interview faking, warning instructions, and its impact on applicant reactions. *Frontiers in Psychology, 7*, Article 1771. <https://doi.org/10.3389/fpsyg.2016.01771>

<sup>1</sup>Lee, C. (2016). *Honesty-Humility and the overclaiming technique* (Master's thesis). Retrieved from <https://prism.ucalgary.ca/handle/11023/3366>

<sup>1</sup>Lee, K., & Ashton, M. C. (2005). Psychopathy, Machiavellianism, and Narcissism in the Five-Factor Model and the HEXACO model of personality structure. *Personality and Individual Differences, 38*, 1571–1582. <https://doi.org/10.1016/j.paid.2004.09.016>

<sup>1,4</sup>Lee, K., & Ashton, M. C. (2012). Getting mad and getting even: Agreeableness and Honesty-Humility as predictors of revenge intentions. *Personality and Individual Differences, 52*, 596–600. <https://doi.org/10.1016/j.paid.2011.12.004>

<sup>1,6</sup>Lee, K., Ashton, M. C., Choi, J., & Zachariassen, K. (2015). Connectedness to nature and to humanity: Their association and personality correlates. *Frontiers in Psychology, 6*, Article 1003. <https://doi.org/10.3389/fpsyg.2015.01003>

<sup>1</sup>Lee, K., Ashton, M. C., & de Vries, R. E. (2005). Predicting workplace delinquency and integrity with the HEXACO and Five-factor models of personality structure. *Human Performance, 18*, 179–197. [https://doi.org/10.1207/s15327043hup1802\\_4](https://doi.org/10.1207/s15327043hup1802_4)

- <sup>1</sup>Lee, K., Ashton, M. C., Morrison, D. L., Cordery, J., & Dunlop, P. D. (2008). Predicting integrity with the HEXACO personality model: Use of self- and observer reports. *Journal of Occupational and Organizational Psychology*, 81, 147–167. <https://doi.org/10.1348/096317907X195175>
- <sup>6</sup>Lee, K., Ashton, M. C., Ogunfowora, B., Bourdage, J. S., & Shin, K.-H. (2010). The personality bases of socio-political attitudes: The role of Honesty-Humility and Openness to Experience. *Journal of Research in Personality*, 44, 115–119. <https://doi.org/10.1016/j.jrp.2009.08.007>
- <sup>1</sup>Lee, K., Ashton, M. C., Wiltshire, J., Bourdage, J. S., Visser, B. A., & Gallucci, A. (2013). Sex, power, and money: Prediction from the Dark Triad and Honesty-Humility. *European Journal of Personality*, 27, 169–184. <https://doi.org/10.1002/per.1860>
- <sup>1</sup>Lee, K., Gizzarone, M., & Ashton, M. C. (2003). Personality and the likelihood to sexually harass. *Sex Roles*, 49, 59–69. <https://doi.org/10.1023/A:1023961603479>
- <sup>1,6</sup>Lee, K., Ogunfowora, B., & Ashton, M. C. (2005). Personality traits beyond the Big Five: Are they within the HEXACO space? *Journal of Personality*, 73, 1437–1463. <https://doi.org/10.1111/j.1467-6494.2005.00354.x>
- <sup>3,5</sup>Lee, K.-S., Lee, J.-H., & Lee, Y.-H. (2015). The effect of personality type on human performance tool compliance and general recommendations for enhancement of the its practical utilization. *Journal of the Ergonomics Society of Korea*, 34(1), 54–62. <http://dx.doi.org/10.5143/JESK.2015.34.1.45>
- <sup>6</sup>Leone, L., Chirumbolo, A., & Desimoni, M. (2012). The impact of the HEXACO personality model in predicting socio-political attitudes: The moderating role of interest in politics. *Personality and Individual Differences*, 52, 416–421. <https://doi.org/10.1016/j.paid.2011.10.049>
- <sup>6</sup>Leone, L., Desimoni, M., & Chirumbolo, A. (2012). HEXACO, social worldviews and socio-political attitudes: A mediation analysis. *Personality and Individual Differences*, 53, 995–1001. <https://doi.org/10.1016/j.paid.2012.07.016>
- <sup>5,6</sup>Lin, W.-L., Hsu, K.-Y., Chen, H.-C., & Chang, W.-Y. (2013). Different attentional traits, different creativities. *Thinking Skills and Creativity*, 9, 96–106. <https://doi.org/10.1016/j.tsc.2012.10.002>
- <sup>6</sup>Litman, J. A., & Mussel, P. (2013). Validity of the interest-and deprivation-type epistemic curiosity model in Germany. *Journal of Individual Differences*, 34(2), 59–68. <https://doi.org/10.1027/1614-0001/a000100>
- <sup>6</sup>Liu, J., Ludeke, S. G., & Zettler, I. (2017). The HEXACO correlates of authoritarianism's facets in the US and Denmark. *Personality and Individual Differences*, 116, 348–352. <https://doi.org/10.1016/j.paid.2017.05.015>
- <sup>1</sup>Livingston, R. W., Cohen, T. R., & Halevy, N. (2016). *Empowering the wolf in sheep's clothing: Why people choose the wrong leaders*. Retrieved from <http://citeseerx.ist.psu.edu/viewdoc/download?doi=10.1.1.167.3103&rep=rep1&type=pdf>
- <sup>2</sup>Lodewyk, K. R. (2017). Associations between trait personality, anxiety, self-efficacy and intentions to exercise by gender in high school physical education. *Educational Psychology*, 38, 487–501. <https://doi.org/10.1080/01443410.2017.1375081>

- <sup>3,5</sup>Lodewyk, K., & Sullivan, P. (2017). Gender-specific associations between personality traits, physical activity, and body size dissatisfaction. *JTRM in Kinesiology*. Retrieved from <https://eric.ed.gov/?id=EJ1126012>
- <sup>1,2,5</sup>Louw, K. R., Dunlop, P. D., Yeo, G. B., & Griffin, M. A. (2016). Mastery approach and performance approach: The differential prediction of organizational citizenship behavior and workplace deviance, beyond HEXACO personality. *Motivation and Emotion*, 40, 566–576. <https://doi.org/10.1007/s11031-016-9551-0>
- <sup>3</sup>Lowe, R. L. (2015). *The relationship between personality, self-care, stress, and perceived wellness in psychology doctoral students* (Doctoral dissertation). Retrieved from <http://search.ebscohost.com/login.aspx?direct=true&db=psyh&AN=2016-31154-201&site=ehost-live>
- <sup>1,3,5</sup>Luksyte, A., Avery, D. R., & Yeo, G. (2015). It is worse when you do it: Examining the interactive effects of coworker presenteeism and demographic similarity. *Journal of Applied Psychology*, 100, 1107–1123. <https://doi.org/10.1037/a0038755>
- <sup>3,6</sup>MacInnis, C. C., Busseri, M. A., Choma, B. L., & Hodson, G. (2013). The happy cyclist: Examining the association between generalized authoritarianism and subjective well-being. *Personality and Individual Differences*, 55, 789–793. <https://doi.org/10.1016/j.paid.2013.06.018>
- <sup>1</sup>Manson, J. H. (2015). Life history strategy and the HEXACO personality dimensions. *Evolutionary Psychology*, 13, 48–66. <https://doi.org/10.1177/147470491501300104>
- <sup>1</sup>Marcus, B., Lee, K., & Ashton, M. C. (2007). Personality dimensions explaining relationships between integrity tests and counterproductive behavior: Big five, or one in addition? *Personnel Psychology*, 60(1), 1–34. <https://doi.org/10.1111/j.1744-6570.2007.00063.x>
- <sup>1</sup>Marcus, B., te Nijenhuis, J., Cremers, M., & van der Heijden-Lek, K. (2016). Tests of integrity, HEXACO personality, and General Mental Ability, as predictors of integrity ratings in the Royal Dutch Military Police. *International Journal of Selection and Assessment*, 24, 63–70. <https://doi.org/10.1111/ijsa.12130>
- <sup>1</sup>Marcus, D. K., Zeigler-Hill, V., Mercer, S. H., & Norris, A. L. (2014). The psychology of spite and the measurement of spitefulness. *Psychological Assessment*, 26, 563–574. <https://doi.org/10.1037/a0036039>
- <sup>1</sup>Markowitz, E. M., Goldberg, L. R., Ashton, M. C., & Lee, K. (2012). Profiling the “pro-environmental individual”: A personality perspective. *Journal of Personality*, 80, 81–111. <https://doi.org/10.1111/j.1467-6494.2011.00721.x>
- <sup>1,5</sup>Mayer, W. R. (2012). *Proposed DSM-5 personality traits and substance use: A multi-faceted study* (Doctoral dissertation).
- <sup>5</sup>McAbee, S. T., Oswald, F. L., & Connelly, B. S. (2014). Bifactor models of personality and college student performance: A broad versus narrow view. *European Journal of Personality*, 28, 604–619. <https://doi.org/10.1002/per.1975>
- <sup>5</sup>McClure, J. A. (2012). *Investigating personality vulnerability to suicide ideation in community-residing older adults* (Master's thesis). Retrieved from <http://ir.lib.uwo.ca/etd/1013>

<sup>1,3,6</sup>McFarland, S., Webb, M., & Brown, D. (2012). All humanity is my ingroup: A measure and studies of identification with all humanity. *Journal of Personality and Social Psychology*, 103, 830–853. <https://doi.org/10.1037/a0028724>

<sup>1,2,6</sup>McKay, A. S. (2014). *Improving data quality with four short sentences: How an honor code can make the difference during data collection* (Master's thesis). Retrieved from <https://scholarworks.lib.csusb.edu/etd/78>

<sup>6</sup>McKibben, W. B., & Silvia, P. J. (2015). Evaluating the distorting effects of inattentive responding and social desirability on self-report scales in creativity and the arts. *The Journal of Creative Behavior*, 51, 57–69. <https://doi.org/10.1002/jocb.86>

<sup>1</sup>Mededović, J. (2017). The profile of a criminal offender depicted by HEXACO personality traits. *Personality and Individual Differences*, 107, 159–163. <https://doi.org/10.1016/j.paid.2016.11.015>

<sup>1</sup>Mededović, J., & Petrović, B. (2015). The Dark Tetrad: Structural properties and location in the personality space. *Journal of Individual Differences*, 36, 228–236. <https://doi.org/10.1027/1614-0001/a000179>

<sup>1</sup>Meere, M., & Egan, V. (2017). Everyday sadism, the Dark Triad, personality, and disgust sensitivity. *Personality and Individual Differences*, 112, 157–161. <https://doi.org/10.1016/j.paid.2017.02.056>

<sup>4</sup>Michalica, K. (2005). *The role of personality and situational factors in forgiveness* (Master's thesis). Retrieved from <http://dr.library.brocku.ca/handle/10464/2271>

<sup>1</sup>Miller, J. D., Gaughan, E. T., Pryor, L. R., Kamen, C., & Campbell, W. K. (2009). Is research using the Narcissistic Personality Inventory relevant for understanding narcissistic personality disorder? *Journal of Research in Personality*, 43, 482–488. <https://doi.org/10.1016/j.jrp.2009.02.001>

<sup>1</sup>Miller, J. D., Hyatt, C. S., Rausher, S., Maples, J. L., & Zeichner, A. (2014). A test of the construct validity of the Elemental Psychopathy Assessment scores in a community sample of adults. *Psychological Assessment*, 26, 555–562. <https://doi.org/10.1037/a0035952>

<sup>1</sup>Mischkowski, D., & Glöckner, A. (2016). Spontaneous cooperation for prosocials, but not for proselfs: Social value orientation moderates spontaneous cooperation behavior. *Scientific Reports*, 6, Article 21555. <https://doi.org/10.1038/srep21555>

<sup>1</sup>Mischkowski, D., Thielmann, I., & Glöckner, A. (2018). Think it through before making a choice? Processing mode does not influence social mindfulness. *Journal of Experimental Social Psychology*, 74, 85–97. <https://doi.org/10.1016/j.jesp.2017.09.001>

<sup>1</sup>Mogilski, J. K., & Welling, L. L. M. (2017). Staying friends with an ex: Sex and dark personality traits predict motivations for post-relationship friendship. *Personality and Individual Differences*, 115, 114–119. <https://doi.org/10.1016/j.paid.2016.04.016>

<sup>3</sup>Molho, C., Roberts, S. G. B., de Vries, R. E., & Pollet, T. V. (2016). The six dimensions of personality (HEXACO) and their associations with network layer size and emotional closeness to network members. *Personality and Individual Differences*, 99, 144–148. <https://doi.org/10.1016/j.paid.2016.04.096>

<sup>3</sup>Monfort, S. S. (2010). *Reactions to daily events as a function of emotionality, social support, and familiarity with the environment* (Undergraduate honor's thesis). Retrieved from <https://scholarworks.wm.edu/cgi/viewcontent.cgi?referer=https://www.google.dk/&httpsredir=1&article=1760&context=honorstheses>

<sup>1</sup>Mularczyk, K. (2017). *Identifying antisocial youth through broad and specific measures of personality* (Master's thesis). Retrieved from [http://dr.library.brocku.ca/bitstream/handle/10464/12932/Brock\\_Mularczyk\\_Kimberly\\_2017.pdf](http://dr.library.brocku.ca/bitstream/handle/10464/12932/Brock_Mularczyk_Kimberly_2017.pdf)

<sup>6</sup>Mussel, P. (2010). Epistemic curiosity and related constructs: Lacking evidence of discriminant validity. *Personality and Individual Differences*, 49, 506–510. <https://doi.org/10.1016/j.paid.2010.05.014>

<sup>3</sup>Noble, R. (2016). *Basic needs satisfaction survey: Validation, physical health and mental wellbeing, and influences from childhood*. Retrieved from [https://economics.nd.edu/assets/165165/rebecca\\_noble\\_bernoullisubmission.pdf](https://economics.nd.edu/assets/165165/rebecca_noble_bernoullisubmission.pdf)

<sup>5</sup>Noftle, E. E., & Robins, R. W. (2007). Personality predictors of academic outcomes: Big five correlates of GPA and SAT scores. *Journal of Personality and Social Psychology*, 93, 116–130. <http://dx.doi.org/10.1037/0022-3514.93.1.116>

<sup>1,3</sup>Ogunfowora, B., & Bourdage, J. S. (2014). Does Honesty-Humility influence evaluations of leadership emergence? The mediating role of moral disengagement. *Personality and Individual Differences*, 56, 95–99. <https://doi.org/10.1016/j.paid.2013.08.026>

<sup>1</sup>Ogunfowora, B., Bourdage, J. S., & Nguyen, B. (2013). An exploration of the dishonest side of self-monitoring: Links to moral disengagement and unethical business decision making. *European Journal of Personality*, 27, 532–544. <https://doi.org/10.1002/per.1931>

<sup>1</sup>Oh, I.-S., Lee, K., Ashton, M. C., & de Vries, R. E. (2011). Are dishonest extraverts more harmful than dishonest introverts? The interaction effects of honesty-humility and extraversion in predicting workplace deviance. *Applied Psychology*, 60, 496–516. <https://doi.org/10.1111/j.1464-0597.2011.00445.x>

<sup>5</sup>Oh, I.-S., Le, H., Whitman, D. S., Kim, K., Yoo, T.-Y., Hwang, J.-O., & Kim, C.-S. (2014). The incremental validity of honesty-humility over cognitive ability and the Big Five personality traits. *Human Performance*, 27, 206–224. <https://doi.org/10.1080/08959285.2014.913594>

<sup>5</sup>O'Neill, T. A., & Kline, T. J. B. (2008). Personality as a predictor of teamwork: A business simulator study. *North American Journal of Psychology*, 10(1), 65–77.

<sup>1,4</sup>O'Neill, T. A., Lewis, R. J., & Carswell, J. J. (2011). Employee personality, justice perceptions, and the prediction of workplace deviance. *Personality and Individual Differences*, 51, 595–600. <https://doi.org/10.1016/j.paid.2011.05.025>

<sup>1</sup>Oostrom, J. K., Köbis, N. C., Ronay, R., & Cremers, M. (2017). False consensus in situational judgment tests: What would others do? *Journal of Research in Personality*, 71, 33–45. <https://doi.org/10.1016/j.jrp.2017.09.001>

<sup>1</sup>O'Reilly, C. A., III, Doerr, B., & Chatman, J. A. (2018). “See You in Court”: How CEO narcissism increases firms' vulnerability to lawsuits. *The Leadership Quarterly*, 29, 365–378. <https://doi.org/10.1016/j.leaqua.2017.08.001>



<sup>6</sup>Orlić, A., Pejčić, B., Lazarević, D., & Milanović, I. (2016). The predictors of students' attitude towards inclusion of children with disabilities in physical education classes. *Physical Culture*, 70(2), 126–134. <https://doi.org/10.5937/fizkul1602126O>

<sup>1</sup>Owens, B. P., Johnson, M. D., & Mitchell, T. R. (2013). Expressed humility in organizations: Implications for performance, teams, and leadership. *Organization Science*, 24, 1517–1538. <https://doi.org/10.1287/orsc.1120.0795>

<sup>1,5</sup>Pailing, A., Boon, J., & Egan, V. (2014). Personality, the Dark Triad and violence. *Personality and Individual Differences*, 67, 81–86. <https://doi.org/10.1016/j.paid.2013.11.018>

<sup>5</sup>Pedooem, R. (2007). *Relationship between HEXACO personality factors and task and contextual performance: Moderating effect of career advancement opportunity*. Moderating effect of career advancement opportunity (Doctoral dissertation).

<sup>5</sup>Pendergast, K. A. (2017). *The role of resilience, emotion regulation, and perceived stress on college academic performance* (Master's thesis). Retrieved from <http://scholar.utc.edu/theses/512>

<sup>1</sup>Perugini, M., & Leone, L. (2009). Implicit self-concept and moral action. *Journal of Research in Personality*, 43, 747–754. <https://doi.org/10.1016/j.jrp.2009.03.015>

<sup>1</sup>Perugini, M., & Richetin, J. (2007). In the land of the blind, the one-eyed man is king. *European Journal of Personality*, 21, 977–981. <https://doi.org/10.1002/per.649>

<sup>1</sup>Perugini, M., Tan, J. H. W., & Zizzo, D. J. (2010). Which is the more predictable gender? Public good contribution and personality. *Economic Issues*, 15(1), 83–110.

<sup>1,3</sup>Pfattheicher, S., & Böhm, R. (2017). Honesty-Humility under threat: Self-uncertainty destroys trust among the nice guys. *Journal of Personality and Social Psychology*, 114, 179–194. <https://doi.org/10.1037/pspp0000144>

<sup>1</sup>Pham, M. N., Barbaro, N., Mogilski, J. K., Shackelford, T. K., & Zeigler-Hill, V. (2017). Post-fight respect signals valuations of opponent's fighting performance. *Personality and Social Psychology Bulletin*, 43, 407–417. <https://doi.org/10.1177/0146167216686661>

<sup>1</sup>Pilch, I., & Górnik-Durose, M. E. (2016). Do we need “dark” traits to explain materialism? The incremental validity of the Dark Triad over the HEXACO domains in predicting materialistic orientation. *Personality and Individual Differences*, 102, 102–106. <https://doi.org/10.1016/j.paid.2016.06.047>

<sup>1</sup>Plouffe, R. A., Saklofske, D. H., & Smith, M. M. (2017). The assessment of sadistic personality: Preliminary psychometric evidence for a new measure. *Personality and Individual Differences*, 104, 166–171. <https://doi.org/10.1016/j.paid.2016.07.043>

<sup>3</sup>Pollock, N. C., Noser, A. E., Holden, C. J., & Zeigler-Hill, V. (2016). Do orientations to happiness mediate the associations between personality traits and subjective well-being? *Journal of Happiness Studies*, 17, 713–729. <https://doi.org/10.1007/s10902-015-9617-9>

<sup>3,5</sup>Pozzebon, J. A., Ashton, M. C., & Visser, B. A. (2014). Major changes: Personality, ability, and congruence in the prediction of academic outcomes. *Journal of Career Assessment*, 22, 75–88. <https://doi.org/10.1177/1069072713487858>

<sup>1,3</sup>Provenzano, D. (2016). *The adaptiveness of antisocial personality traits: Obtaining reputation, resources, and reproduction through bullying* (Master's thesis). Retrieved from <https://dr.library.brocku.ca/handle/10464/10785>

<sup>1</sup>Rauthmann, J. F. (2013). Investigating the MACH-IV with item response theory and proposing the Trimmed MACH\*. *Journal of Personality Assessment*, 95, 388–397. <https://doi.org/10.1080/00223891.2012.742905>

<sup>2,3</sup>Resseguier, B., Léger, P.-M., Sénécal, S., Bastarache-Roberge, M.-C., & Courtemanche, F. (2016). The influence of personality on users' emotional reactions. In F. F.-H. Nah & C.-H. Tan (Eds.), *HCI in Business, Government, and Organizations: Information Systems. HCIBGO 2016. Lecture Notes in Computer Science* (Vol. 9752). Cham, Switzerland: Springer. [https://doi.org/10.1007/978-3-319-39399-5\\_9](https://doi.org/10.1007/978-3-319-39399-5_9)

<sup>1</sup>Ritchie, M. B. (2016). *Telltale gait: The role of nonverbal cues in perceptions of personality and vulnerability* (Master's thesis). Retrieved from <https://curve.carleton.ca/bee993df-bcd8-4f68-9da6-5ccf523ebe0d>

<sup>1</sup>Rolison, J. J., Hanoach, Y., & Gummerum, M. (2013). Characteristics of offenders: The HEXACO model of personality as a framework for studying offenders' personality. *Journal of Forensic Psychiatry and Psychology*, 24, 71–82. <https://doi.org/10.1080/14789949.2012.752024>

<sup>1,3,4</sup>Romero, E., Villar, P., & López-Romero, L. (2015). Assessing six factors in Spain: Validation of the HEXACO-100 in relation to the Five Factor Model and other conceptually relevant criteria. *Personality and Individual Differences*, 76, 75–81. <https://doi.org/10.1016/j.paid.2014.11.056>

<sup>1</sup>Roulin, N., & Bourdage, J. S. (2017). Once an impression manager, always an impression manager? Antecedents of honest and deceptive impression management use and variability across multiple job interviews. *Frontiers in Psychology*, 8, Article 29. <https://doi.org/10.3389/fpsyg.2017.00029>

<sup>1</sup>Ruch, W., Brunsch, R., & Wagner, L. (2017). The role of character traits in economic games. *Personality and Individual Differences*, 108, 186–190. <https://doi.org/10.1016/j.paid.2016.12.007>

<sup>1,3,5</sup>Ruchensky, J. R., & Donnellan, M. B. (2017). Integrating the HEXACO model with the Triarchic conceptualization of psychopathy. *Personality and Individual Differences*, 119, 129–133. <https://doi.org/10.1016/j.paid.2017.07.006>

<sup>5</sup>Samuel, D. B., Riddell, A. D. B., Lynam, D. R., Miller, J. D., & Widiger, T. A. (2012). A five-factor measure of obsessive-compulsive personality traits. *Journal of Personality Assessment*, 94, 456–465. <https://doi.org/10.1080/00223891.2012.677885>

<sup>5</sup>Samuel, D. B., & Widiger, T. A. (2011). Conscientiousness and obsessive-compulsive personality disorder. *Personality Disorders: Theory, Research, and Treatment*, 2, 161–174. <https://doi.org/10.1037/a0021216>

<sup>2</sup>Sarno, D. M. (2015). *The effect of stereoscopic (3D) movies on psychological and physiological experiences* (Master's thesis). Retrieved from [http://vc.bridgew.edu/honors\\_proj/99](http://vc.bridgew.edu/honors_proj/99)

- <sup>1</sup>Saroglou, V., Pichon, I., Trompette, L., Verschueren, M., & Dernelle, R. (2005). Prosocial behavior and religion: New evidence based on projective measures and peer ratings. *Journal for the Scientific Study of Religion*, 44, 323–348. <https://doi.org/10.1111/j.1468-5906.2005.00289.x>
- <sup>3</sup>Saucier, G. (2010). The structure of social effects: Personality as impact on others. *European Journal of Personality*, 24, 222–240. <https://doi.org/10.1002/per.761>
- <sup>1</sup>Schmidt, J. A., Ogunfowora, B., & Bourdage, J. S. (2012). No person is an island: The effects of group characteristics on individual trait expression. *Journal of Organizational Behavior*, 33, 925–945. <https://doi.org/10.1002/job.781>
- <sup>1</sup>Schwager, I. T. L., Hülshager, U. R., & Lang, J. W. B. (2016). Be aware to be on the square: Mindfulness and counterproductive academic behavior. *Personality and Individual Differences*, 93, 74–79. <https://doi.org/10.1016/j.paid.2015.08.043>
- <sup>3</sup>Schyns, B., Maslyn, J. M., & van Veldhoven, M. P. M. (2012). Can some leaders have a good relationship with many followers? The role of personality in the relationship between leader-member exchange and span of control. *Leadership & Organization Development Journal*, 33, 594–606. <https://doi.org/10.1108/01437731211253046>
- <sup>3</sup>Sekwena, E. K., & Fontaine, J. R. J. (2017). Redefining and assessing emotional understanding based on the componential emotion approach. *South African Journal of Psychology*, 48, 243–254. <https://doi.org/10.1177/0081246317714681>
- <sup>1</sup>Shaw, A. Z. (2013). The effect of prenatal androgen exposure on the development of neural reactivity systems: A study of the HEXACO Personality Inventory. *Personality and Individual Differences*, 55, 19–23. <https://doi.org/10.1016/j.paid.2013.01.016>
- <sup>4</sup>Shepherd, S., & Belicki, K. (2008). Trait forgiveness and traitedness within the HEXACO model of personality. *Personality and Individual Differences*, 45, 389–394. <https://doi.org/10.1016/j.paid.2008.05.011>
- <sup>4</sup>Sheppard, K. E., & Boon, S. D. (2012). Predicting appraisals of romantic revenge: The roles of honesty–humility, agreeableness, and vengefulness. *Personality and Individual Differences*, 52, 128–132. <https://doi.org/10.1016/j.paid.2011.09.014>
- <sup>3</sup>Sherman, R. A., Rauthmann, J. F., Brown, N. A., Serfass, D. G., & Jones, A. B. (2015). The independent effects of personality and situations on real-time expressions of behavior and emotion. *Journal of Personality and Social Psychology*, 109, 872–888. <http://dx.doi.org/10.1037/pspp0000036>
- <sup>6</sup>Siahpoush, F. (2008). *Humility and its implication for therapist epistemology and practice* (Doctoral dissertation). Retrieved from <http://ufdc.ufl.edu/UFE0022477/00001>
- <sup>3,4,6</sup>Sibley, C. G. (2011). The BIAS-Treatment Scale (BIAS-TS): A measure of the subjective experience of active and passive harm and facilitation. *Journal of Personality Assessment*, 93, 300–315. <https://doi.org/10.1080/00223891.2011.559389>
- <sup>6</sup>Sibley, C. G., Harding, J. F., Perry, R., Asbrock, F., & Duckitt, J. (2010). Personality and prejudice: Extension to the HEXACO personality model. *European Journal of Personality*, 24, 515–534. <https://doi.org/10.1002/per.750>

- <sup>6</sup>Silvia, P. J., Kaufman, J. C., Reiter-Palmon, R., & Wigert, B. (2011). Cantankerous creativity: Honesty-Humility, Agreeableness, and the HEXACO structure of creative achievement. *Personality and Individual Differences*, 51, 687–689. <https://doi.org/10.1016/j.paid.2011.06.011>
- <sup>6</sup>Silvia, P. J., Nusbaum, E. C., & Beaty, R. E. (2014). Blessed are the meek? Honesty-humility, agreeableness, and the HEXACO structure of religious beliefs, motives, and values. *Personality and Individual Differences*, 66, 19–23. <https://doi.org/10.1016/j.paid.2014.02.043>
- <sup>6</sup>Silvia, P. J., Nusbaum, E. C., & Beaty, R. E. (2017). Old or new? Evaluating the old/new scoring method for divergent thinking tasks. *Journal of Creative Behavior*, 51, 216–224. <https://doi.org/10.1002/jocb.101>
- <sup>4,6</sup>Skomorovsky, A. (2009). *Structured Interview Questionnaire: Examining convergent and predictive validity in a sample of privates* (Technical Memorandum – DGMPRA-TM-2009-004). Retrieved from <http://cradpdf.drdc.gc.ca/PDFS/unc86/p531593.pdf>
- <sup>1</sup>Smith, R. D. (2015). *The relationship between HEXACO personality traits and cyberbullying perpetrators and victims* (Doctoral dissertation). Retrieved from <https://digitalcommons.liberty.edu/doctoral/1058>
- <sup>1</sup>Somma, A., Fossati, A., Patrick, C., Maffei, C., & Borroni, S. (2014). The three-factor structure of the Levenson Self-Report Psychopathy Scale: Fool's gold or true gold? A study in a sample of Italian adult non-clinical participants. *Personality and Mental Health*, 8, 337–347. <https://doi.org/10.1002/pmh.1267>
- <sup>1,3,5</sup>Spadafora, N. (2015). *Examining bullying intervention motivations through a cost/benefit analysis* (Master's thesis). Retrieved from <https://dr.library.brocku.ca/handle/10464/7182>
- <sup>1,4</sup>Stavrova, O., & Schlösser, T. (2015). Solidarity and social justice: Effect of individual differences in justice sensitivity on solidarity behaviour. *European Journal of Personality*, 29, 2–16. <https://doi.org/10.1002/per.1981>
- <sup>1</sup>Stead, R. (2016). *The dark personality and job success in the United States Army: Use of interpersonal manipulation in the workplace* (Doctoral dissertation). Retrieved from <https://search.ebscohost.com/login.aspx?direct=true&db=psych&AN=2017-01055-208&site=ehost-live>
- <sup>2</sup>Stikma, M. (2015). *An examination of relationships between mindfulness, personality, anxiety, and depression in Americans and Japanese college students* (Master's thesis). Retrieved from [https://fau.digital.flvc.org/islandora/object/fau%3A31331/datastream/OBJ/view/An\\_examination\\_of\\_relationships\\_between\\_mindfulness\\_personality\\_anxiety\\_and\\_depression\\_in\\_Americans\\_and\\_Japanese\\_college\\_students.pdf](https://fau.digital.flvc.org/islandora/object/fau%3A31331/datastream/OBJ/view/An_examination_of_relationships_between_mindfulness_personality_anxiety_and_depression_in_Americans_and_Japanese_college_students.pdf)
- <sup>5</sup>Stoeber, J. (2014). How other-oriented perfectionism differs from self-oriented and socially prescribed perfectionism. *Journal of Psychopathology and Behavioral Assessment*, 36, 329–338. <https://doi.org/10.1007/s10862-013-9397-7>
- <sup>1</sup>Strouts, P. H., Brase, G. L., & Dillon, H. M. (2017). Personality and evolutionary strategies: The relationships between HEXACO traits, mate value, life history strategy, and sociosexuality. *Personality and Individual Differences*, 115, 128–132. <https://doi.org/10.1016/j.paid.2016.03.047>

- <sup>6</sup>Stürmer, S., Benbow, A. E. F., Siem, B., Barth, M., Bodansky, A. N., & Lotz-Schmitt, K. (2013). Psychological foundations of xenophilia: The role of major personality traits in predicting favorable attitudes toward cross-cultural contact and exploration. *Journal of Personality and Social Psychology*, 105, 832–851. <https://doi.org/10.1037/a0033488>
- <sup>2</sup>Sween, M., Ceschi, A., Tommasi, F., Sartori, R., & Weller, J. (2017). Who is a distracted driver? Associations between mobile phone use while driving, domain-specific risk taking, and personality. *Risk Analysis*, 37, 2119–2131. <https://doi.org/10.1111/risa.12773>
- <sup>1</sup>Swiden Wick, R. (2016). *Personality and interpersonal aspects of the work environment* (Master's thesis). Retrieved from <https://stars.library.ucf.edu/cgi/viewcontent.cgi?article=2468&context=honorstheses1990-2015>
- <sup>1</sup>Synyak, K. (2014). *Exploring relationships between resume fraud and individual differences* (Master's thesis). Retrieved from <https://ir.lib.uwo.ca/etd/2546>
- <sup>6</sup>Szeto, A. C. H., O'Neill, T. A., & Dobson, K. S. (2015). The association between personality and individual differences and stigma toward people with mental disorders. *American Journal of Psychiatric Rehabilitation*, 18, 303–332. <https://doi.org/10.1080/15487768.2015.1089799>
- <sup>1</sup>Taylor, J. M., Bailey, S. F., & Barber, L. K. (2015). Academic entitlement and counterproductive research behavior. *Personality and Individual Differences*, 85, 13–18. <https://doi.org/10.1016/j.paid.2015.04.024>
- <sup>1,5</sup>Thalmayer, A. G., Saucier, G., & Eigenhuis, A. (2011). Comparative validity of brief to medium-length Big Five and Big Six personality questionnaires. *Psychological Assessment*, 23, 995–1009. <https://doi.org/10.1037/a0024165>
- <sup>1</sup>Thielmann, I., & Böhm, R. (2016). Who does (not) participate in intergroup conflict? *Social Psychological and Personality Science*, 7, 778–787. <https://doi.org/10.1177/1948550616660160>
- <sup>1,4</sup>Thielmann, I., & Hilbig, B. E. (2014). Trust in me, trust in you: A social projection account of the link between personality, cooperativeness, and trustworthiness expectations. *Journal of Research in Personality*, 50(1), 61–65. <https://doi.org/10.1016/j.jrp.2014.03.006>
- <sup>1</sup>Thielmann, I., & Hilbig, B. E. (2015). The traits one can trust: Dissecting reciprocity and kindness as determinants of trustworthy behavior. *Personality and Social Psychology Bulletin*, 41, 1523–1536. <https://doi.org/10.1177/0146167215600530>
- <sup>1,4</sup>Thielmann, I., Hilbig, B. E., & Niedtfeld, I. (2014). Willing to give but not to forgive: Borderline personality features and cooperative behavior. *Journal of Personality Disorders*, 28, 778–795. [https://doi.org/10.1521/pedi\\_2014\\_28\\_135](https://doi.org/10.1521/pedi_2014_28_135)
- <sup>1,2</sup>Thielmann, I., Hilbig, B. E., Zettler, I., & Moshagen, M. (2016). On measuring the sixth basic personality dimension: A comparison between HEXACO Honesty-Humility and Big Six Honesty-Propriety. *Assessment*, 24, 1024–1036. <https://doi.org/10.1177/1073191116638411>
- <sup>1</sup>Thielmann, I., Zimmermann, J., Leising, D., & Hilbig, B. E. (2017). Seeing is knowing: On the predictive accuracy of self- and informant reports for prosocial and moral behaviours. *European Journal of Personality*, 31, 404–418. <https://doi.org/10.1002/per.2112>
- <sup>1</sup>Torres-Marín, J., Navarro-Carrillo, G., & Carretero-Dios, H. (2018). Is the use of humor associated with anger management? The assessment of individual differences in humor styles in

Spain. *Personality and Individual Differences*, 120, 193–201.  
<https://doi.org/10.1016/j.paid.2017.08.040>

<sup>2,5</sup>Twigger, K. (2010). *An examination of the role of personality and self-regulation in the gambling behaviours of late adolescents and emerging adults* (Master's thesis). Retrieved from <https://dr.library.brocku.ca/handle/10464/3378>

<sup>1,4</sup>Urbig, D., Terjesen, S., Procher, V., Muehlfeld, K., & van Witteloostuijn, A. (2016). Come on and take a free ride: Contributing to public goods in native and foreign language settings. *Academy of Management Learning & Education*, 15, 268–286.  
<https://doi.org/10.5465/amle.2014.0338>

<sup>1,5</sup>Van den Berg, G. A. (2011). *Organizational welfare: The importance of self-control to human capital management* (Master's thesis). Retrieved from [http://www.innovatiefinwerk.nl/sites/innovatiefinwerk.nl/files/field/bijlage/berg.g\\_a\\_van\\_den\\_berg.pdf](http://www.innovatiefinwerk.nl/sites/innovatiefinwerk.nl/files/field/bijlage/berg.g_a_van_den_berg.pdf)

<sup>1</sup>Van der Linden, D., te Nijenhuis, J., Cremers, M., van de Ven, C., & van der Heijden-Lek, K. (2014). The general factor of personality (GFP) relates to other ratings of character and integrity: Two validity studies in personnel selection and training of the Dutch armed forces. *International Journal of Selection and Assessment*, 22, 261–271. <https://doi.org/10.1111/ijsa.12075>

<sup>1</sup>Van Doesum, N. J., van Lange, D. A. W., & van Lange, P. (2013). Social mindfulness: Skill and will to navigate the social world. *Journal of Personality and Social Psychology*, 105, 86–103.  
<http://dx.doi.org/10.1037/a0032540>

<sup>1</sup>Van Gelder, J.-L., & de Vries, R. E. (2012). Traits and states: Integrating personality and affect into a model of criminal decision making. *Criminology*, 50, 637–671.  
<https://doi.org/10.1111/j.1745-9125.2012.00276.x>

<sup>1</sup>Van Gelder, J.-L., & de Vries, R. E. (2014). Rational misbehavior? Evaluating an integrated dual-process model of criminal decision making. *Journal of Quantitative Criminology*, 30(1), 1–27. <https://doi.org/10.1007/s10940-012-9192-8>

<sup>1</sup>Van Gelder, J.-L., & de Vries, R. E. (2016). Traits and states at work: Lure, risk and personality as predictors of occupational crime. *Psychology, Crime & Law*, 22(7), 1–20.  
<https://doi.org/10.1080/1068316X.2016.1174863>

<sup>1,2,5</sup>Van Gelder, J.-L., Nee, C., Otte, M., Demetriou, A., van Sintemaartensdijk, I., & van Prooijen, J.-W. (2017). Virtual burglary: Exploring the potential of virtual reality to study burglary in action. *Journal of Research in Crime and Delinquency*, 54, 29–62.  
<https://doi.org/10.1177/0022427816663997>

<sup>1</sup>Visser, B. A., Ashton, M. C., & Pozzebon, J. A. (2012). Is low anxiety part of the psychopathy construct? *Journal of Personality*, 80, 725–747. <https://doi.org/10.1111/j.1467-6494.2011.00745.x>

<sup>1,2</sup>Visser, B. A., Pozzebon, J. A., & Reina-Tamayo, A. M. (2014). Status-driven risk taking: Another “dark” personality? *Canadian Journal of Behavioural Science*, 46, 485–496.  
<https://doi.org/10.1037/a0034163>

<sup>1</sup>Vopersal, A. M. (2011). *What motivates third parties to take sides?: Effect of subjective power and personal characteristics* (Master's thesis). Retrieved from <https://essay.utwente.nl/61009>

- <sup>1</sup>Vrabel, J. K., Zeigler-Hill, V., & Shango, R. G. (2017). Spitefulness and humor styles. *Personality and Individual Differences*, 105, 238–243. <https://doi.org/10.1016/j.paid.2016.10.001>
- <sup>2</sup>Wang, S. (2011). *Study of personality and ways of coping with conflict stress in a negotiation context* (Master's thesis). Retrieved from <http://arno.uvt.nl/show.cgi?fid=122181>
- <sup>1</sup>Wasti, S. A., Lee, K., Ashton, M. C., & Somer, O. (2008). Six Turkish personality factors and the HEXACO model of personality structure. *Journal of Cross-Cultural Psychology*, 39, 665–684. <https://doi.org/10.1177/0022022108323783>
- <sup>3</sup>Watson, D., Stasik, S. M., Ellickson-Larew, S., & Stanton, K. (2015). Explicating the psychopathological correlates of anomalous sleep experiences. *Psychology of Consciousness: Theory, Research, and Practice*, 2, 57–78. <http://dx.doi.org/10.1037/cns0000038>
- <sup>2</sup>Weller, J. A., & Thulin, E. W. (2012). Do honest people take fewer risks? Personality correlates of risk-taking to achieve gains and avoid losses in HEXACO space. *Personality and Individual Differences*, 53, 923–926. <https://doi.org/10.1016/j.paid.2012.06.010>
- <sup>2</sup>Weller, J. A., & Tikir, A. (2011). Predicting domain-specific risk taking with the HEXACO personality structure. *Journal of Behavioral Decision Making*, 24, 180–201. <https://doi.org/10.1002/bdm.677>
- <sup>1</sup>Westhead, J., & Egan, V. (2015). Untangling the concurrent influences of the Dark Triad, personality and mating effort on violence. *Personality and Individual Differences*, 86, 222–226. <https://doi.org/10.1016/j.paid.2015.05.031>
- <sup>1</sup>Wilkin, C. L. (2012). *The green-eyed monster strikes back: Moderators and mediators of the relationship between distributive justice and theft* (Doctoral dissertation). Retrieved from <https://macsphere.mcmaster.ca/handle/11375/21167>
- <sup>1</sup>Wilkin, C. L., & Connelly, C. E. (2015). Green with envy and nerves of steel: Moderated mediation between distributive justice and theft. *Personality and Individual Differences*, 72, 160–164. <https://doi.org/10.1016/j.paid.2014.08.039>
- <sup>2</sup>Williams, L. J. H. (2015). *Risk stakeholder personality traits and risk decision making: A financial services case study* (Master's thesis). Retrieved from <http://dspace.nwu.ac.za/handle/10394/17108>
- <sup>1</sup>Wiltshire, J. (2016). *Towards the dark side of political skill: Development and validation of the Dark Political Skill Scale* (Doctoral dissertation). Retrieved from <https://prism.ucalgary.ca/handle/11023/3197>
- <sup>1,2,3</sup>Wiltshire, J., Bourdage, J. S., & Lee, K. (2014). Honesty-Humility and perceptions of organizational politics in predicting workplace outcomes. *Journal of Business and Psychology*, 29, 235–251. <https://doi.org/10.1007/s10869-013-9310-0>
- <sup>1</sup>Woodley, H. J. R. (2017). *That's not fair! Examining individual differences in perceptions of fairness* (Doctoral dissertation). Retrieved from [https://ir.lib.uwo.ca/etd/4470/?utm\\_source=ir.lib.uwo.ca%2Fetd%2F4470&utm\\_medium=PDF&utm\\_campaign=PDFCoverPages](https://ir.lib.uwo.ca/etd/4470/?utm_source=ir.lib.uwo.ca%2Fetd%2F4470&utm_medium=PDF&utm_campaign=PDFCoverPages)

<sup>1</sup>Worth, N. (2007). *Psychopathy and self-monitoring: Additive and interactive effects on self-presentation tactics* (Master's thesis). Retrieved from <https://dr.library.brocku.ca/handle/10464/1416>

<sup>1</sup>Worth, N. (2015). *Players and avatars: The connections between player personality, avatar personality, and behavior in video games* (Doctoral dissertation). Retrieved from <https://dr.library.brocku.ca/handle/10464/6985>

<sup>1</sup>Worth, N. C., & Book, A. S. (2014). Personality and behavior in a massively multiplayer online role-playing game. *Computers in Human Behavior*, 38, 322–330. <https://doi.org/10.1016/j.chb.2014.06.009>

<sup>1</sup>Worth, N. C., & Book, A. S. (2015). Dimensions of video game behavior and their relationships with personality. *Computers in Human Behavior*, 50, 132–140. <https://doi.org/10.1016/j.chb.2015.03.056>

<sup>1</sup>Wright, J. (2015). *The immoral morality tale: Justice affirmation in the Machiavellian antihero* (Master's thesis). Retrieved from <https://prism.ucalgary.ca/handle/11023/2527>

<sup>1</sup>Wright, J. C., Nadelhoffer, T., Thomson Ross, L., & Sinnott-Armstrong, W. (2018). Be it ever so humble: Proposing a dual-dimension account and measurement of humility. *Self and Identity*, 17, 92–125. <https://doi.org/10.1080/15298868.2017.1327454>

<sup>1</sup>Zeigler-Hill, V., Besser, A., & Marcus, D. K. (2017). The roles of personality traits and perceived threat in the attitudes of Israelis toward peace with the Palestinians. *Personality and Individual Differences*, 116, 296–300. <https://doi.org/10.1016/j.paid.2017.05.007>

<sup>1</sup>Zeigler-Hill, V., Noser, A. E., Roof, C., Vonk, J., & Marcus, D. K. (2015). Spitefulness and moral values. *Personality and Individual Differences*, 77, 86–90. <https://doi.org/10.1016/j.paid.2014.12.050>

<sup>1</sup>Zettler, I., Friedrich, N., & Hilbig, B. E. (2011). Dissecting work commitment: The role of Machiavellianism. *Career Development International*, 16, 20–35. <https://doi.org/10.1108/13620431111107793>

<sup>6</sup>Zettler, I., & Hilbig, B. E. (2010). Attitudes of the selfless: Explaining political orientation with altruism. *Personality and Individual Differences*, 48, 338–342. <https://doi.org/10.1016/j.paid.2009.11.002>

<sup>1</sup>Zettler, I., & Hilbig, B. E. (2010). Honesty-humility and a person-situation interaction at work. *European Journal of Personality*, 24, 569–582. <https://doi.org/10.1002/per.757>

<sup>6</sup>Zettler, I., Hilbig, B. E., & Haubrich, J. (2011). Altruism at the ballots: Predicting political attitudes and behavior. *Journal of Research in Personality*, 45, 130–133. <https://doi.org/10.1016/j.jrp.2010.11.010>

<sup>1</sup>Zettler, I., Hilbig, B. E., & Heydasch, T. (2013). Two sides of one coin: Honesty-Humility and situational factors mutually shape social dilemma decision making. *Journal of Research in Personality*, 47, 286–295. <https://doi.org/10.1016/j.jrp.2013.01.012>

<sup>1</sup>Zhao, K., Ferguson, E., & Smillie, L. D. (2016). Prosocial personality traits differentially predict egalitarianism, generosity, and reciprocity in economic games. *Frontiers in Psychology*, 7, Article 1137. <https://doi.org/10.3389/fpsyg.2016.01137>



<sup>1</sup>Zhao, K., Ferguson, E., & Smillie, L. D. (2017). Individual differences in good manners rather than compassion predict fair allocations of wealth in the dictator game. *Journal of Personality*, 85, 244–256. <https://doi.org/10.1111/jopy.12237>

<sup>1</sup>Zhao, K., Ferguson, E., & Smillie, L. D. (2017). Politeness and compassion differentially predict adherence to fairness norms and interventions to norm violations in economic games. *Scientific Reports*, 7(1), Article 3415. <https://doi.org/10.1038/s41598-017>

<sup>1</sup>Zietlow, K. J. (2015). *Socio-demographic and psychological determinants of water conservation behavior: Evidence from Germany and Jordan* (Doctoral dissertation). Retrieved from <https://edoc.hu-berlin.de/docviews/abstract.php?id=42474>
